# Supplementary material for: Confining the Concept of Vascular Depression to Late-Onset Depression: A Meta-Analysis of MRI-Defined Hyperintensity Burden in Major Depressive Disorder and Bipolar Disorder
Source: Front Psychol. 2019 May 31;10:1241. doi: 10.3389/fpsyg.2019.01241 (PMC6555192; doi:10.3389/fpsyg.2019.01241)
Supplement: Supplementary file 1 [file Data_Sheet_1.csv]

Coding scheme displaying included studies
ID	No	Sample	Disorder	Authors	Year	Title	Journal	P.N	P.male	P.age	P.age.SD	Age.onset	Onset.group	Illness.duration	Antidep.med	Dep.scale	P.dep.score	P.dep.score.SD	P.Hypertension	P.Diabetes	P.Smoking	C.N	C.male	C.age	C.age.SD	C.dep.score	C.dep.score.SD	C.Hypertension	C.Diabetes	C.Smoking	Outcome.type	P.Outcome	P.Outcome.SD	C.Outcome	C.Outcome.SD	Matching	Blinded	Lesion.assessment	Outcome.measure	Primary.int	Rating.scale	Tesla	Layer	Slice.thickness	Gap
70	34	45	D	Agid, R., Levin, T., Gomori, J. M., Lerer, B., & Bonne, O.	2003	T2-weighted image hyperintensities in major depression: focus on the basal ganglia	International Journal of Neuropsychopharmacology, 6, 215–224	37	0.432	55	16.3		4						0	0		27	0.481	50	11.2			0	0		1	277.08	878.4	54.7	57	0	1	5	2	1		2	5	5	1
51	28	37	B1	Ahn, K. H., Lyoo, I. K., Lee, H. K., Song, I. C., Oh, J. S., Hwang, J., Kwon, J., Kim, M. J., Kim, M., & Renshaw, P. F.	2004	White matter hyperintensities in subjects with bipolar disorder	Psychiatry and Clinical Neurosciences, 58, 516–521	43	0.442	36.9	11.5		4									39	0.436	35.1	9.7						2	0.4186	0.7314	0.0796	0.27	0	1	1	1	1	2	1.5	1
52	28	37	B1	Ahn, K. H., Lyoo, I. K., Lee, H. K., Song, I. C., Oh, J. S., Hwang, J., Kwon, J., Kim, M. J., Kim, M., & Renshaw, P. F.	2004			43	0.442	36.9	11.5		4									39	0.436	35.1	9.7						3	0.093	0.294	0.0256	0.1601	0	1	1	1	1	2	1.5	1
1	1	1	D	Allan, C. L.	2014	Brain MRI correlates of depression and vascular risk: Whitehall Imaging sub-study	Doctoral thesis, UCL (University College London)	32	0.7813	68.9	5.7		2		0.143	CES-D	10.3	9.1				94	0.8723	69.2	5.3	3.2	2.5				2	1.6	0.7539	1.3373	0.6105	0	1	1	1	1	2	3	1
2	1	1	D	Allan, C. L.	2014			32	0.7813	68.9	5.7		2		0.143	CES-D	10.3	9.1				94	0.8723	69.2	5.3	3.2	2.5				3	1.65	0.6708	1.494	0.6123	0	1	1	1	1	2	3	1
3	1	1	D	Allan, C. L.	2014			32	0.7813	68.9	5.7		2		0.143	CES-D	10.3	9.1				94	0.8723	69.2	5.3	3.2	2.5				1	0.54	0.72	0.44	0.4	0		2	2	1		3
4	2	2	D	Alves, G. S., Karakaya, T., Fußer, F., Kordulla, M., O'Dwyer, L., Christl, J., Magerkurth, J., Oertel-Knöchel, V., Knöchel, C., Prvulovic, D., Jurcoane, A., Laks, J., Engelhardt, E., Hampel, H., & Pantel, J.	2012	Association of microstructural white matter abnormalities with cognitive dysfunction in geriatric patients with major depression	Psychiatry Research: Neuroimaging, 203, 194-200	17	0.5294	65.53	5.46		2		0.7058							18	0.3889	66.44	3.47						1	1.59	0.62	1.5	0.62	1	1	1	1	0	2	3
118	48	62	B	Birner, A., Seiler, S., Lackner, N., Bengesser, S. A., Queissner, R., Fellendorf, F. T., Platzer, M., Ropele, S., Enzinger, C., Schwingenschuh, P., Mangge, H., Pirpamer, L., Deutschmann, H., McIntyre, R. S., Kapfhammer, H.-P., Reininghaus, B., & Reininghaus, E. Z.	2015	Cerebral White Matter Lesions and Affective Episodes Correlate in Male Individuals with Bipolar Disorder	PLoS ONE, 10(8), e0135313	100	0.52	44	14	24.84	4	19.06	0.38				0.29	0.07	0.49	54	0.426	41	16			0.222	0	0.241	1	0.3359	0.4093	0.1942	0.1486	0	1	3	2	1		3	1	3
64	32	42	D	Brown, F. W., Lewine, R. J., Hudgins, P. A., & Risch, S. C.	1992	White Matter Hyperintensity Signals in Psychiatric and Nonpsychiatric Subjects	The American Journal of Psychiatry, 149(5), 620-625	28		40.3	10.5		4									154		34	9.5						3	0.1071	0.567	0.0519	0.298	0	1	1	1	1	1		1	7
65	32	42	D	Brown, F. W., Lewine, R. J., Hudgins, P. A., & Risch, S. C.	1992			28		40.3	10.5		4									154		34	9.5						2	0.2143	0.6299	0.0649	0.2724	0	1	1	1	1	1		1	7
71	35	46	D	Chen, C.-S., Chen, C.-C., Kuo, Y.-T,., Chiang, I.-C., Ko, C.-H., & Lin, H.-F.	2006	Carotid intima-media thickness in late-onset major depressive disorder	International Journal of Geriatric Psychiatry, 21, 36–42	14	0.429	75.1	6.3	70	1			HRSD	22	7.8	0.714	0.357		11	0.364	72.6	8.1	2.9	3.1	0.364	0.091		1	3.2	1.6	2.3	1.8	0	1	1	1	0	2	3	1
73	37	48	D	Colloby, S. J., Vasudev, A., O’Brien, J. T., Firbank, M. J., Parry, S. W., & Thomas, A. J.	2011	Relationship of orthostatic blood pressure to white matter hyperintensities and subcortical volumes in late-life depression	British Journal of Psychiatry, 199(5), 404-410	38	0.289	74.1	6.1	51.8	2	23	0.842							30	0.333	74.4	6.4						3	0.64	0.66	0.62	0.66	0		2	2	1		3	2
74	37	48	D	Colloby, S. J., Vasudev, A., O’Brien, J. T., Firbank, M. J., Parry, S. W., & Thomas, A. J.	2011			38	0.289	74.1	6.1	51.8	2	23	0.842							30	0.333	74.4	6.4						2	0.2	0.29	0.32	0.7	0		2	2	1		3	2
76	39	50	B1	Davis, K. A., Kwon, A., Cardenas, V. A., & Deicken, R. F.	2004	Decreased cortical gray and cerebral white matter in male patients with familial bipolar I disorder	Journal of Affective Disorders, 82(3), 475–485	22	1	43.1	11.2		4	22.5	0.591							32	1	37.8	10.8						1	0.31	0.3	0.34	0.45	0	1	3	2	0		1.5
59	30	40	B1	de Asis, J. M., Greenwald, B. S., Alexopoulos, G. S., Kiosses, D. N., Ashtari, M., Heo, M., & Young, R. C.	2006	Frontal Signal Hyperintensities in Mania in Old Age	American Journal of Geriatric Psychiatry, 14(7), 598- 604	40	0.45	69.8	6.7	51.8	2									15	0.364	66.9	6.5						2L	2	1.1	0.9	1.1	0	1	1	1	1	5	1.5	1	5
60	30	40	B1	de Asis, J. M., Greenwald, B. S., Alexopoulos, G. S., Kiosses, D. N., Ashtari, M., Heo, M., & Young, R. C.	2006			40	0.45	69.8	6.7	51.8	2									15	0.364	66.9	6.5						2R	1.9	1	1.1	1.2	0	1	1	1	1	5	1.5	1	5
61	30	40	B1	de Asis, J. M., Greenwald, B. S., Alexopoulos, G. S., Kiosses, D. N., Ashtari, M., Heo, M., & Young, R. C.	2006			40	0.45	69.8	6.7	51.8	2									15	0.364	66.9	6.5						5L	2.3	1	2.5	0.8	0	1	1	1	1	5
62	30	40	B1	de Asis, J. M., Greenwald, B. S., Alexopoulos, G. S., Kiosses, D. N., Ashtari, M., Heo, M., & Young, R. C.	2006			40	0.45	69.8	6.7	51.8	2									15	0.364	66.9	6.5						5R	2.4	0.9	2.4	0.8	0	1	1	1	1	5
77	40	51	D	Delaloye, C., Moy, G., de Bilbao, F., Baudois, S., Weber, K., Hofer, F., Ragno Paquier, C., Donati, A., Canuto, A., Giardini, U., von Gunten, A., Stancu, R. I., Lazeyras, F., Millet, P., Scheltens, P., Giannakopoulos, P., & Gold, G.	2010	Neuroanatomical and neuropsychological features of elderly euthymic depressed patients with early- and late-onset	Journal of the Neurological Sciences, 299(1-2), 19-23	30	0.3636	65	4.24	35.67	3	29.33	0.5							30	0.2667	70.83	6.78						3	0.8	0.96	0.83	1.05	0	0	1	1	1	3	3	3
78	40	51	D	Delaloye, C., Moy, G., de Bilbao, F., Baudois, S., Weber, K., Hofer, F., Ragno Paquier, C., Donati, A., Canuto, A., Giardini, U., von Gunten, A., Stancu, R. I., Lazeyras, F., Millet, P., Scheltens, P., Giannakopoulos, P., & Gold, G.	2010			30	0.3636	65	4.24	35.67	3	29.33	0.5							30	0.2667	70.83	6.78						2	3.23	4.13	2.87	4.99	0	0	1	1	1	3	3	3
79	40	51	D	Delaloye, C., Moy, G., de Bilbao, F., Baudois, S., Weber, K., Hofer, F., Ragno Paquier, C., Donati, A., Canuto, A., Giardini, U., von Gunten, A., Stancu, R. I., Lazeyras, F., Millet, P., Scheltens, P., Giannakopoulos, P., & Gold, G.	2010			30	0.3636	65	4.24	35.67	3	29.33	0.5							30	0.2667	70.83	6.78						5	0.13	0.43	0.4	1.1	0	0	1	1	1	3	3	3
81	40	52	D	Delaloye, C., Moy, G., de Bilbao, F., Baudois, S., Weber, K., Hofer, F., Ragno Paquier, C., Donati, A., Canuto, A., Giardini, U., von Gunten, A., Stancu, R. I., Lazeyras, F., Millet, P., Scheltens, P., Giannakopoulos, P., & Gold, G.	2010			11		75.82	6.48	74.09	1	1.73	0.73							30	0.2667	70.83	6.78						3	2.45	1.44	0.83	1.05	0	0	1	1	1	3	3	3
82	40	52	D	Delaloye, C., Moy, G., de Bilbao, F., Baudois, S., Weber, K., Hofer, F., Ragno Paquier, C., Donati, A., Canuto, A., Giardini, U., von Gunten, A., Stancu, R. I., Lazeyras, F., Millet, P., Scheltens, P., Giannakopoulos, P., & Gold, G.	2010			11		75.82	6.48	74.09	1	1.73	0.73							30	0.2667	70.83	6.78						2	6.45	6.3	2.87	4.99	0	0	1	1	1	3	3	3
83	40	52	D	Delaloye, C., Moy, G., de Bilbao, F., Baudois, S., Weber, K., Hofer, F., Ragno Paquier, C., Donati, A., Canuto, A., Giardini, U., von Gunten, A., Stancu, R. I., Lazeyras, F., Millet, P., Scheltens, P., Giannakopoulos, P., & Gold, G.	2010			11		75.82	6.48	74.09	1	1.73	0.73							30	0.2667	70.83	6.78						5	0.73	1.85	0.4	1.1	0	0	1	1	1	3	3	3
84	40	52	D	Delaloye, C., Moy, G., de Bilbao, F., Baudois, S., Weber, K., Hofer, F., Ragno Paquier, C., Donati, A., Canuto, A., Giardini, U., von Gunten, A., Stancu, R. I., Lazeyras, F., Millet, P., Scheltens, P., Giannakopoulos, P., & Gold, G.	2010			11		75.82	6.48	74.09	1	1.73	0.73							30	0.2667	70.83	6.78						11	0.73	1.68	0	0	0	0	1	1	1	3	3	3
88	43	56	B1	El-Badri, S. M., Cousins, D., Parker, S., Ashton, H., McAllister, V., Ferrier, I., & Moore, P.	2006	Magnetic resonance imaging abnormalities in young euthymic patients with bipolar affective disorder	British Journal of Psychiatry, 189, 81-82	50	0.3	30.2	6.2		4	8.9								26	0.5	30.2	6.2						2	0.14	0.4522	0	0	1	0	1	1	1	2	0.5
89	43	56	B1	El-Badri, S. M., Cousins, D., Parker, S., Ashton, H., McAllister, V., Ferrier, I., & Moore, P.	2006			50	0.3	30.2	6.2		4	8.9								26	0.5	30.2	6.2						3	0.08	0.4445	0	0	1	0	1	1	1	2	0.5
19	10	12	D	Emsell, L., Adamson, C., De Winter, F.-L., Billiet, T., Christiaens, D., Bouckaert, F., Adamczuk, K., Vandenberghe, R., Seal, M. L., Sienaert, P., Sunaert, S., & Vandenbulcke, M.	2017	Corpus callosum macro and microstructure in late-life depression	Journal of Affective Disorders, 222, 63-70	55	0.29	73.6	7.4		2			GDS	23	4				52	0.27	72.7	6.54	3	3				1	20.1	14.7	17.6	11.6	1		2	2	0		3	1	1.2
6	4	4	D	Feng, C., Fang, M., Xu, Y., Hua, T., & Liu, X.-Y.	2014	Microbleeds in Late-Life Depression: Comparison of Early- and Late-Onset Depression	BioMed Research International, 2014, 682092	57	0.3509	71.84	4.95		3			GDS	8.96	1.77	0.649	0.211		85	0.5176	72.25	5.87	2.36	1.5	0.612	0.282		3	1.14	0.95	0.94	0.92	0	1	1	1	1	2	3	1
7	4	4	D	Feng, C., Fang, M., Xu, Y., Hua, T., & Liu, X.-Y.	2014			57	0.3509	71.84	4.95		3			GDS	8.96	1.77	0.649	0.211		85	0.5176	72.25	5.87	2.36	1.5	0.612	0.282		2	0.96	0.82	0.86	0.79	0	1	1	1	1	2	3	1
8	4	5	D	Feng, C., Fang, M., Xu, Y., Hua, T., & Liu, X.-Y.	2014			84	0.369	73.23	4.78		1			GDS	8.62	1.96	0.702	0.345		85	0.5176	72.25	5.87	2.36	1.5	0.612	0.282		3	1.56	0.97	0.94	0.92	0	1	1	1	1	2	3	1
9	4	5	D	Feng, C., Fang, M., Xu, Y., Hua, T., & Liu, X.-Y.	2014			84	0.369	73.23	4.78		1			GDS	8.62	1.96	0.702	0.345		85	0.5176	72.25	5.87	2.36	1.5	0.612	0.282		2	1.54	0.94	0.86	0.79	0	1	1	1	1	2	3	1
10	4	6	D	Feng, C., Fang, M., Xu, Y., Hua, T., & Liu, X.-Y.	2014			54	0.352	73.06	5.61		4			GDS	9.09	1.73	0.611	0.296		85	0.5176	72.25	5.87	2.36	1.5	0.612	0.282		3	1.3	1.06	0.94	0.92	0	1	1	1	1	2	3	1
11	4	6	D	Feng, C., Fang, M., Xu, Y., Hua, T., & Liu, X.-Y.	2014			54	0.352	73.06	5.61		4			GDS	9.09	1.73	0.611	0.296		85	0.5176	72.25	5.87	2.36	1.5	0.612	0.282		2	1.06	0.92	0.86	0.79	0	1	1	1	1	2	3	1
90	44	57	D	Firbank, M. J., Lloyd, A. J., Ferrier, N., & O’Brien, J. T.	2004	A Volumetric Study of MRI Signal Hyperintensities in Late-Life Depression	American Journal of Geriatric Psychiatry, 12(6), 606-612	29	0.207	75.7	5.9		2			MADRS	30.7	7.8	0.31	0.069		32	0.219	74.9	7	2	2.1	0.469	0.031		1	0.95	0.66	0.755	0.545	0		2	2	1		1	1	5	1.5
91	44	57	D	Firbank, M. J., Lloyd, A. J., Ferrier, N., & O’Brien, J. T.	2004			29	0.207	75.7	5.9		2			MADRS	30.7	7.8	0.31	0.069		32	0.219	74.9	7	2	2.1	0.469	0.031		2	0.17	0.14	0.145	0.115	0		2	2	1		1	1	5	1.5
92	44	57	D	Firbank, M. J., Lloyd, A. J., Ferrier, N., & O’Brien, J. T.	2004			29	0.207	75.7	5.9		2			MADRS	30.7	7.8	0.31	0.069		32	0.219	74.9	7	2	2.1	0.469	0.031		5	0.0255	0.0195	0.0305	0.0235	0		2	2	1		1	1	5	1.5
12	5	7	B	Gildengers, A. G., Butters, M. A., Aizenstein, H. J., Marron, M. M., Emanuel, J., Anderson, S. J., Weissfeld, L. A., Becker, J. T., Lopez, O. L., Mulsant, B. H., & Reynolds III, C. F.	2015	Longer lithium exposure is associated with better white matter integrity in older adults with bipolar disorder	Bipolar Disorders, 17, 248–256	58	0.293	64.5	9.8		2									21	0.476	65.6	7.5						1	0.002	0.003	0.0007	0.0009	1		2	2	0		3	1
96	46	59	D	Greenwald, B. S., Kramer-Ginsberg, E., Krishnan, K. R. R., Ashtari, M., Auerbach, C., & Patel, M.	1998	Neuroanatomic Localization of Magnetic Resonance Imaging Signal Hyperintensities in Geriatric Depression	Stroke,29, 613-617	35	0.26	74.7	6.4	56.5	2			HDRS	27	5.7	0.63	0.06	0	31	0.58	72.9	4.7	3	2.3	0.19	0.06	0	2FR	2.47	2.21	1.42	2.01	0	1	1	1	1	3	1	1	5	2.5
97	46	59	D	Greenwald, B. S., Kramer-Ginsberg, E., Krishnan, K. R. R., Ashtari, M., Auerbach, C., & Patel, M.	1998			35	0.26	74.7	6.4	56.5	2			HDRS	27	5.7	0.63	0.06	0	31	0.58	72.9	4.7	3	2.3	0.19	0.06	0	2FL	2.29	2.1	0.84	1.53	0	1	1	1	1	3	1	1	5	2.5
98	46	59	D	Greenwald, B. S., Kramer-Ginsberg, E., Krishnan, K. R. R., Ashtari, M., Auerbach, C., & Patel, M.	1998			35	0.26	74.7	6.4	56.5	2			HDRS	27	5.7	0.63	0.06	0	31	0.58	72.9	4.7	3	2.3	0.19	0.06	0	2PR	1.56	2.06	0.71	1.27	0	1	1	1	1	3	1	1	5	2.5
99	46	59	D	Greenwald, B. S., Kramer-Ginsberg, E., Krishnan, K. R. R., Ashtari, M., Auerbach, C., & Patel, M.	1998			35	0.26	74.7	6.4	56.5	2			HDRS	27	5.7	0.63	0.06	0	31	0.58	72.9	4.7	3	2.3	0.19	0.06	0	2PL	1.65	2.14	0.52	1.03	0	1	1	1	1	3	1	1	5	2.5
100	46	59	D	Greenwald, B. S., Kramer-Ginsberg, E., Krishnan, K. R. R., Ashtari, M., Auerbach, C., & Patel, M.	1998			35	0.26	74.7	6.4	56.5	2			HDRS	27	5.7	0.63	0.06	0	31	0.58	72.9	4.7	3	2.3	0.19	0.06	0	2OR	1.73	2.11	0.97	1.6	0	1	1	1	1	3	1	1	5	2.5
101	46	59	D	Greenwald, B. S., Kramer-Ginsberg, E., Krishnan, K. R. R., Ashtari, M., Auerbach, C., & Patel, M.	1998			35	0.26	74.7	6.4	56.5	2			HDRS	27	5.7	0.63	0.06	0	31	0.58	72.9	4.7	3	2.3	0.19	0.06	0	2OL	1.94	2.19	1.13	1.73	0	1	1	1	1	3	1	1	5	2.5
102	46	59	D	Greenwald, B. S., Kramer-Ginsberg, E., Krishnan, K. R. R., Ashtari, M., Auerbach, C., & Patel, M.	1998			35	0.26	74.7	6.4	56.5	2			HDRS	27	5.7	0.63	0.06	0	31	0.58	72.9	4.7	3	2.3	0.19	0.06	0	2TR	0.42	0.98	0.03	0.18	0	1	1	1	1	3	1	1	5	2.5
103	46	59	D	Greenwald, B. S., Kramer-Ginsberg, E., Krishnan, K. R. R., Ashtari, M., Auerbach, C., & Patel, M.	1998			35	0.26	74.7	6.4	56.5	2			HDRS	27	5.7	0.63	0.06	0	31	0.58	72.9	4.7	3	2.3	0.19	0.06	0	2TL	0.21	0.73	0.13	0.56	0	1	1	1	1	3	1	1	5	2.5
104	46	59	D	Greenwald, B. S., Kramer-Ginsberg, E., Krishnan, K. R. R., Ashtari, M., Auerbach, C., & Patel, M.	1998			35	0.26	74.7	6.4	56.5	2			HDRS	27	5.7	0.63	0.06	0	31	0.58	72.9	4.7	3	2.3	0.19	0.06	0	6R	0.71	1.06	0.42	0.67	0	1	1	1	1	3	1	1	5	2.5
105	46	59	D	Greenwald, B. S., Kramer-Ginsberg, E., Krishnan, K. R. R., Ashtari, M., Auerbach, C., & Patel, M.	1998			35	0.26	74.7	6.4	56.5	2			HDRS	27	5.7	0.63	0.06	0	31	0.58	72.9	4.7	3	2.3	0.19	0.06	0	6L	0.56	1.11	0.26	0.44	0	1	1	1	1	3	1	1	5	2.5
106	46	59	D	Greenwald, B. S., Kramer-Ginsberg, E., Krishnan, K. R. R., Ashtari, M., Auerbach, C., & Patel, M.	1998			35	0.26	74.7	6.4	56.5	2			HDRS	27	5.7	0.63	0.06	0	31	0.58	72.9	4.7	3	2.3	0.19	0.06	0	7R	1.21	1.59	0.81	1.11	0	1	1	1	1	3	1	1	5	2.5
107	46	59	D	Greenwald, B. S., Kramer-Ginsberg, E., Krishnan, K. R. R., Ashtari, M., Auerbach, C., & Patel, M.	1998			35	0.26	74.7	6.4	56.5	2			HDRS	27	5.7	0.63	0.06	0	31	0.58	72.9	4.7	3	2.3	0.19	0.06	0	7L	1.56	1.67	0.75	1.09	0	1	1	1	1	3	1	1	5	2.5
108	46	59	D	Greenwald, B. S., Kramer-Ginsberg, E., Krishnan, K. R. R., Ashtari, M., Auerbach, C., & Patel, M.	1998			35	0.26	74.7	6.4	56.5	2			HDRS	27	5.7	0.63	0.06	0	31	0.58	72.9	4.7	3	2.3	0.19	0.06	0	8R	0.88	1.18	0.52	0.96	0	1	1	1	1	3	1	1	5	2.5
109	46	59	D	Greenwald, B. S., Kramer-Ginsberg, E., Krishnan, K. R. R., Ashtari, M., Auerbach, C., & Patel, M.	1998			35	0.26	74.7	6.4	56.5	2			HDRS	27	5.7	0.63	0.06	0	31	0.58	72.9	4.7	3	2.3	0.19	0.06	0	8L	0.62	0.98	0.52	1.03	0	1	1	1	1	3	1	1	5	2.5
110	46	59	D	Greenwald, B. S., Kramer-Ginsberg, E., Krishnan, K. R. R., Ashtari, M., Auerbach, C., & Patel, M.	1998			35	0.26	74.7	6.4	56.5	2			HDRS	27	5.7	0.63	0.06	0	31	0.58	72.9	4.7	3	2.3	0.19	0.06	0	9R	0.56	0.99	0.26	0.63	0	1	1	1	1	3	1	1	5	2.5
111	46	59	D	Greenwald, B. S., Kramer-Ginsberg, E., Krishnan, K. R. R., Ashtari, M., Auerbach, C., & Patel, M.	1998			35	0.26	74.7	6.4	56.5	2			HDRS	27	5.7	0.63	0.06	0	31	0.58	72.9	4.7	3	2.3	0.19	0.06	0	9L	0.74	1.14	0.48	1.03	0	1	1	1	1	3	1	1	5	2.5
112	46	59	D	Greenwald, B. S., Kramer-Ginsberg, E., Krishnan, K. R. R., Ashtari, M., Auerbach, C., & Patel, M.	1998			35	0.26	74.7	6.4	56.5	2			HDRS	27	5.7	0.63	0.06	0	31	0.58	72.9	4.7	3	2.3	0.19	0.06	0	10R	0.09	0.29	0.22	0.76	0	1	1	1	1	3	1	1	5	2.5
113	46	59	D	Greenwald, B. S., Kramer-Ginsberg, E., Krishnan, K. R. R., Ashtari, M., Auerbach, C., & Patel, M.	1998			35	0.26	74.7	6.4	56.5	2			HDRS	27	5.7	0.63	0.06	0	31	0.58	72.9	4.7	3	2.3	0.19	0.06	0	10L	0.18	0.72	0.16	0.58	0	1	1	1	1	3	1	1	5	2.5
93	45	58	D	Greenwald, B. S., Kramer-Ginsberg, E., Krishnan, K. R. R., Ashtari, M., Aupperle, P. M., & Patel, M.	1996	MRI Signal Hyperintensities in Geriatric Depression	The American Journal of Psychiatry, 153(9), 1212-1215	48	0.313	74.6	6.1	62.4	2			HDS	25.9	6.1	0.4	0.125	0.04	39	0.487	72.6	6.4	1.4	1.7	0.49	0.05	0.05	3	1.85	0.83	1.69	0.89	0	1	1	1	1	2	1	1	7	0.7
94	45	58	D	Greenwald, B. S., Kramer-Ginsberg, E., Krishnan, K. R. R., Ashtari, M., Aupperle, P. M., & Patel, M.	1996			48	0.313	74.6	6.1	62.4	2			HDS	25.9	6.1	0.4	0.125	0.04	39	0.487	72.6	6.4	1.4	1.7	0.49	0.05	0.05	2	1.25	1.09	1.26	1.04	0	1	1	1	1	2	1	1	7	0.7
95	45	58	D	Greenwald, B. S., Kramer-Ginsberg, E., Krishnan, K. R. R., Ashtari, M., Aupperle, P. M., & Patel, M.	1996			48	0.313	74.6	6.1	62.4	2			HDS	25.9	6.1	0.4	0.125	0.04	39	0.487	72.6	6.4	1.4	1.7	0.49	0.05	0.05	5	0.53	0.93	0.26	0.64	0	1	1	1	1	2	1	1	7	0.7
114	47	60	D	Greenwald, B. S., Kramer-Ginsberg, E., Krishnan, K. R. R., Hu, J., Ashtari, M., Wu, H., Aupperle, P. M., Patel, M., & Pollack, S.	2001	A Controlled Study of MRI Signal Hyperintensities in Older Depressed Patients with and without Hypertension	Journal of the American Geriatrics Society, 49(9), 1218-1225	40	0.27	74.6	6.2	58.3	2			HDRS	26.35	6.04	1	0.175	0.075	21	0.67	74.6	5.8	1.86	1.62	1	0	0.57	2	1.82	1.11	1.86	0.65		1	1	1	1	2	1	1
115	47	60	D	Greenwald, B. S., Kramer-Ginsberg, E., Krishnan, K. R. R., Hu, J., Ashtari, M., Wu, H., Aupperle, P. M., Patel, M., & Pollack, S.	2001			40	0.27	74.6	6.2	58.3	2			HDRS	26.35	6.04	1	0.175	0.075	21	0.67	74.6	5.8	1.86	1.62	1	0	0.57	5	1.37	1.1	0.67	1.02		1	1	1	1	2	1	1
116	47	61	D	Greenwald, B. S., Kramer-Ginsberg, E., Krishnan, K. R. R., Hu, J., Ashtari, M., Wu, H., Aupperle, P. M., Patel, M., & Pollack, S.	2001			41	0.29	74.7	6.2	61.8	2			HDRS	26.44	5.88	0	0.02	0.12	49	0.47	71.9	5.5	2.18	2.31	0	0.06	0.2	2	1.34	1.11	1.14	1.15		1	1	1	1	2	1	1
117	47	61	D	Greenwald, B. S., Kramer-Ginsberg, E., Krishnan, K. R. R., Hu, J., Ashtari, M., Wu, H., Aupperle, P. M., Patel, M., & Pollack, S.	2001			41	0.29	74.7	6.2	61.8	2			HDRS	26.44	5.88	0	0.02	0.12	49	0.47	71.9	5.5	2.18	2.31	0	0.06	0.2	5	0.71	0.98	0.96	1.04		1	1	1	1	2	1	1
156	64	80	D	Gunning-Dixon, F. M., Walton, M., Cheng, J., Acuna, J., Klimstra, S., Zimmerman, M. E., Brickman, A. M., Hoptman, M. J., Young, R. C., & Alexopoulos, G. S.	2010	MRI Signal Hyperintensities and Treatment Remission of Geriatric Depression	Journal of Affective Disorders, 126(3), 395–401	22	0.364	69.71	4.71	57	2			HDRS	22.29	4.01	0.54			25	0.36	70.68	5.82	1.72	1.82	0.4			13	4.08	5.59	3.11	2.84	0	1	3	2	1		1.5	1	4	1
157	64	81	D	Gunning-Dixon, F. M., Walton, M., Cheng, J., Acuna, J., Klimstra, S., Zimmerman, M. E., Brickman, A. M., Hoptman, M. J., Young, R. C., & Alexopoulos, G. S.	2010			20	0.45	71.18	6.95	58	2			HDRS	22.1	4.04	0.4			25	0.36	70.68	5.82	1.72	1.82	0.4			13	9.5	9.19	3.11	2.84	0	1	3	2	1		1.5	1	4	1
13	6	8	D	Harada, K., Matsuo, K., Nakashima, M., Hobara, T., Higuchi, N., Higuchi, F., Nakano, M., Otsuki, K., Shibata, T., Watanuki, T., Matsubara, T., Fujita, Y., Shimoji, K., Yamagata, H., & Watanabe, Y.	2016	Disrupted orbitomedial prefrontal limbic network in individuals with later-life depression	Journal of Affective Disorders, 204,112–119	45	0.4222	60.2	8.2	49.6	2	10.6	0.911	BDI	24.8	13.5				61	0.2787	62.9	7.6	7.2	4.72				2	0.98	0.99	0.97	0.86	0	1	1	1	0	2	3		6
14	6	8	D	Harada, K., Matsuo, K., Nakashima, M., Hobara, T., Higuchi, N., Higuchi, F., Nakano, M., Otsuki, K., Shibata, T., Watanuki, T., Matsubara, T., Fujita, Y., Shimoji, K., Yamagata, H., & Watanabe, Y.	2016			45	0.4222	60.2	8.2	49.6	2	10.6	0.911	BDI	24.8	13.5				61	0.2787	62.9	7.6	7.2	4.72				3	1.27	0.84	1.16	0.93	0	1	1	1	0	2	3		6
15	6	8	D	Harada, K., Matsuo, K., Nakashima, M., Hobara, T., Higuchi, N., Higuchi, F., Nakano, M., Otsuki, K., Shibata, T., Watanuki, T., Matsubara, T., Fujita, Y., Shimoji, K., Yamagata, H., & Watanabe, Y.	2016			45	0.4222	60.2	8.2	49.6	2	10.6	0.911	BDI	24.8	13.5				61	0.2787	62.9	7.6	7.2	4.72				5	1.16	0.56	1.05	0.76	0	1	1	1	0	2	3		6
124	51	65	D	Hickie, I., Naismith, S., Ward, P. B., Scott, E., Mitchell, P., Wilhelm, K., & Parker, G.	2005	Vascular risk and low serum B12 predict white matter lesions in patients with major depression	Journal of Affective Disorders, 85, 327–332	47	0.36	52.8	12.6	38.3	2									21	0.38	54.7	9.1						2	4.6	6.9	5.2	7.5	0	1	1	1	1	1	1.5	3
125	51	65	D	Hickie, I., Naismith, S., Ward, P. B., Scott, E., Mitchell, P., Wilhelm, K., & Parker, G.	2005			47	0.36	52.8	12.6	38.3	2									21	0.38	54.7	9.1						3	4.5	5.2	4.7	4.9	0	1	1	1	1	1	1.5	3
126	51	65	D	Hickie, I., Naismith, S., Ward, P. B., Scott, E., Mitchell, P., Wilhelm, K., & Parker, G.	2005			47	0.36	52.8	12.6	38.3	2									21	0.38	54.7	9.1						5	3.7	6.4	3.7	5.4	0	1	1	1	1	1	1.5	3
160	66	83	D	Hong, E. D., Taylor, W. D., McQuoid, D. R., Potter, G. G., Payne, M. E., Ashley-Koch, A., & Steffens, D. C.	2009	Influence of the MTHFR C677T polymorphism on MRI hyperintensity volume and cognition in geriatric depression	The American Journal of Geriatric Psychiatry, 17(10), 847–855	178	0.348	69.9	7.7		2									85	0.318	70	5.7						1	7.02	11.23	5.32	7.14	0	0	3	2	1		1.5	1	3	0
161	66	83	D	Hong, E. D., Taylor, W. D., McQuoid, D. R., Potter, G. G., Payne, M. E., Ashley-Koch, A., & Steffens, D. C.	2009			178	0.348	69.9	7.7		2									85	0.318	70	5.7						4	0.27	0.5	0.18	0.26	0	0	3	2	1		1.5	1	3	0
127	52	66	D	Iosifescu, D. V., Papakostas, G. I., Lyoo, I. K., Lee, H. K., Renshaw, P. F., Alpert, J. E., Nierenberg, A., & Fava, M.	2005	Brain MRI white matter hyperintensities and one-carbon cycle metabolism in non-geriatric outpatients with major depressive disorder (Part I)	Psychiatry Research: Neuroimaging, 140, 291– 299	50	0.66	14.6	10.3	27.8	4						0.22	0.02	0.22	35	0.6	39.2	9.8						2	0.26	0.4431	0.371	0.4902	0	1	1	1	1	2	1.5
128	52	66	D	Iosifescu, D. V., Papakostas, G. I., Lyoo, I. K., Lee, H. K., Renshaw, P. F., Alpert, J. E., Nierenberg, A., & Fava, M.	2005			50	0.66	14.6	10.3	27.8	4						0.22	0.02	0.22	35	0.6	39.2	9.8						3	0.52	0.5047	0.429	0.5127	0	1	1	1	1	2	2.5
129	53	67	D	Iosifescu, D. V., Renshaw, P. F., Lyoo, I. K., Lee, H. K., Perlis, R. H., Papakostas, G. I., Nierenberg, A., & Fava, M.	2006	Brain white-matter hyperintensities and treatment outcome in major depressive disorder	British Journal of Psychiatry, 188, 180-185	19	0.47	39.6	7.6		4									35	0.6	39.2	9.8						3	0.3157	0.4776	0.4571	0.5606	1	1	1	1	1	2	1.5
130	53	67	D	Iosifescu, D. V., Renshaw, P. F., Lyoo, I. K., Lee, H. K., Perlis, R. H., Papakostas, G. I., Nierenberg, A., & Fava, M.	2006			19	0.47	39.6	7.6		4									35	0.6	39.2	9.8						2	0.5263	0.7723	0.4286	0.6547	1	1	1	1	1	2	2.5
131	53	68	D	Iosifescu, D. V., Renshaw, P. F., Lyoo, I. K., Lee, H. K., Perlis, R. H., Papakostas, G. I., Nierenberg, A., & Fava, M.	2006			65	0.63	40.7	10.2		4									35	0.6	39.2	9.8						3	0.477	0.562	0.4571	0.5606	1	1	1	1	1	2	1.5
132	53	68	D	Iosifescu, D. V., Renshaw, P. F., Lyoo, I. K., Lee, H. K., Perlis, R. H., Papakostas, G. I., Nierenberg, A., & Fava, M.	2006			65	0.63	40.7	10.2		4									35	0.6	39.2	9.8						2	0.3538	0.6233	0.4286	0.6547	1	1	1	1	1	2	1.5
18	7	11	D	Johnson, A. D., McQuoid, D. R., Steffens, D. C., Payne, M. E., Beyer, J. L., Taylor, W. D.	2016	Effects of stressful life events on cerebral white matter hyperintensity progression	International Journal of Geriatric Psychiatry, in press, DOI: 10.1002/gps.4644	130	0.3749	69.9	7		2		0.91				0.4308			110	0.3	70.2	5.8			0.2273			1	1.42	0.84	1.24	0.78	0	1	3	2	1		1.5	1	3	0
133	54	69	D	Keshavan, M. S., Mulsant, B. H., Sweet, R. A., Pasternak, R., Zubenko, G. S., & Krishnan, R. R.	1996	MRI changes in schizophrenia in late life: a preliminary controlled study	Psychiatry Research, 60, 117-123	19	0.158	67	5.6	53.8	2									19	0.158	64.2	8.3						13	0.95	0.23	0.58	0.51	1	1	1	1	1	2
134	54	69	D	Keshavan, M. S., Mulsant, B. H., Sweet, R. A., Pasternak, R., Zubenko, G. S., & Krishnan, R. R.	1996			19	0.158	67	5.6	53.8	2									19	0.158	64.2	8.3						3	2.11	0.94	2	1.11	1	1	1	1	1	2
135	54	69	D	Keshavan, M. S., Mulsant, B. H., Sweet, R. A., Pasternak, R., Zubenko, G. S., & Krishnan, R. R.	1996			19	0.158	67	5.6	53.8	2									19	0.158	64.2	8.3						2	1.63	0.96	1.37	0.68	1	1	1	1	1	2
136	54	69	D	Keshavan, M. S., Mulsant, B. H., Sweet, R. A., Pasternak, R., Zubenko, G. S., & Krishnan, R. R.	1996			19	0.158	67	5.6	53.8	2									19	0.158	64.2	8.3						5	0.63	0.9	0.26	0.56	1	1	1	1	1	2
21	12	14	B1	Kieseppä, T., Mäntylä, R., Tuulio-Henriksson, A., Luoma, K., Mantere, O., Ketokivi, M., Holma, M., Jylhä, P., Melartin, T., Suominen, K., Vuorilehto, M., & Isometsä, E.	2014	White matter hyperintensities and cognitive performance in adult patients with bipolar I, bipolar II, and major depressive disorders	European Psychiatry, 29(4), 226-232	13	0.769	42.8	11.1		4	15.2	0.42	BDI	19	10				21	0.476	41.7	11.3	2	2				2	1.23077	1.09193	0.61905	0.97346	0	1	1	1	1	1	1.5		5	1
22	12	15	B2	Kieseppä, T., Mäntylä, R., Tuulio-Henriksson, A., Luoma, K., Mantere, O., Ketokivi, M., Holma, M., Jylhä, P., Melartin, T., Suominen, K., Vuorilehto, M., & Isometsä, E.	2014			15	0.467	38.4	9.1		4	12.8	0.79	BDI	26	12				21	0.476	41.7	11.3	2	2				2	0.73333	1.09978	0.61905	0.97346	0	1	1	1	1	1	1.5		5	1
23	12	16	D	Kieseppä, T., Mäntylä, R., Tuulio-Henriksson, A., Luoma, K., Mantere, O., Ketokivi, M., Holma, M., Jylhä, P., Melartin, T., Suominen, K., Vuorilehto, M., & Isometsä, E.	2014			16	0.143	48.4	10.3		4	14.1	0.81	BDI	26	7				21	0.476	41.7	11.3	2	2				2	1.125	1.14746	0.61905	0.97346	0	1	1	1	1	1	1.5		5	1
137	55	70	D	Köhler, S., Ashton, C. H., Marsh, R., Thomas, A. J., Barnett, N. A., & O’Brien, J. T.	2011	Electrophysiological changes in late life depression and their relation to structural brain changes	International Psychogeriatrics, 23(1), 141–148	20	0.3	70.9	6.4		2			MADRS	28.5	5.5				25	0.32	72	6.1	2.6	2.1				1	13.1	7.8	12.4	9.5	0	0	1	1	0	3	1	1	5	0.5
138	56	71	D	Köhler, S., Thomas, A. J., Lloyd, A., Barber, R., Almeida, O. P., & O’Brien, J. T.	2010	White matter hyperintensities, cortisol levels, brain atrophy and continuing cognitive deficits in late-life depression	The British Journal of Psychiatry, 196, 143–149	35	0.2	74.1	6.5		2	1.12	0.28	MADRS	20.6	9.8				29	0.24	72.8	6.9	2	2.1				1	12.2	5.4	13.2	9.9	0	0	1	1	0	3	1	1	5	0.5
142	58	73	D	Kramer-Ginsberg, E., Greenwald, B. S., Krishnan, K. R. R., Christiansen, B., Hu, J., Ashtari, M., Patel, M., & Pollack, S.	1999	Neuropsychological Functioning and MRI Signal Hyperintensities in Geriatric Depression	The American Journal of Psychiatry, 156, 438–444	41	0.27	74.6	6		2			HDRS	26	6.2				38	0.5	72.8	6.4	1.4	1.7				3	1.8293	0.8337	1.7105	0.8977	0	1	1	1	1	2	1	1	7	0.7
143	58	73	D	Kramer-Ginsberg, E., Greenwald, B. S., Krishnan, K. R. R., Christiansen, B., Hu, J., Ashtari, M., Patel, M., & Pollack, S.	1999			41	0.27	74.6	6		2			HDRS	26	6.2				38	0.5	72.8	6.4	1.4	1.7				2	1.1951	1.1004	1.2895	1.0374	0	1	1	1	1	2	1	1	7	0.7
144	58	73	D	Kramer-Ginsberg, E., Greenwald, B. S., Krishnan, K. R. R., Christiansen, B., Hu, J., Ashtari, M., Patel, M., & Pollack, S.	1999			41	0.27	74.6	6		2			HDRS	26	6.2				38	0.5	72.8	6.4	1.4	1.7				5	0.5366	0.9513	0.2632	0.6445	0	1	1	1	1	2	1	1	7	0.7
145	59	74	D	Kumar, A., Bilker, W., Jin, Z., & Udupa, J.	2000	Atrophy and High Intensity Lesions: Complementary Neurobiological Mechanisms in Late-Life Major Depression	Neuropsychopharmacology, 22(3), 264-274	51	0.294	74.3	6.56		2									30	0.233	69.43	6.09						13	1074.6	1523.54	122	184.83	0	0	3	2	1		1.5	1	5	0
146	60	75	D	Lee, S.-H., Payne, M. E., Steffens, D. C., McQuoid, D. R., Lai, T.-J., Provenzale, J. M., & Krishnan, K. R. R.	2003	Subcortical Lesion Severity and Orbitofrontal Cortex Volume in Geriatric Depression	Biological Psychiatry, 54, 529–533	38	0.49	68.73	6.98		2		0.539				0.488	0.098		41	0.171	71.15	6.25			0.275	0.075		2	1.8158	1.036	1.561	0.976	1		1	1	1	1	1.5	1
147	60	75	D	Lee, S.-H., Payne, M. E., Steffens, D. C., McQuoid, D. R., Lai, T.-J., Provenzale, J. M., & Krishnan, K. R. R.	2003			38	0.49	68.73	6.98		2		0.539				0.488	0.098		41	0.171	71.15	6.25			0.275	0.075		5	1.3947	1.175	1.0976	0.889	1		1	1	1	1	1.5	1
148	61	76	D	Lenze, L., Cross, D., McKeel, D., Neuman, R. J., Sheline, Y. I.	1999	White Matter Hyperintensities and Gray Matter Lesions in Physically Healthy Depressed Subjects	The American Journal of Psychiatry, 156(10), 1602-1607	24	0	52.8	18.4	32.4	4						0	0		24	0	52.7	18.4			0	0		1	2534	6064	2409	10324	1	1	3	2	1		1.5
149	61	76	D	Lenze, L., Cross, D., McKeel, D., Neuman, R. J., Sheline, Y. I.	1999			24	0	52.8	18.4	32.4	4						0	0		24	0	52.7	18.4			0	0		12	110	241	40	101	1	1	3	2	1		1.5
150	61	76	D	Lenze, L., Cross, D., McKeel, D., Neuman, R. J., Sheline, Y. I.	1999			24	0	52.8	18.4	32.4	4						0	0		24	0	52.7	18.4			0	0		3	0.73	0.83	0.63	0.66	1	1	1	1	1	2	1.5
151	61	76	D	Lenze, L., Cross, D., McKeel, D., Neuman, R. J., Sheline, Y. I.	1999			24	0	52.8	18.4	32.4	4						0	0		24	0	52.7	18.4			0	0		2	1	0.81	0.83	0.43	1	1	1	1	1	2	1.5
163	68	85	D	Lesser, I. M., Boone, K. B., Mehringer, M., Wohl, M. A., Miller, B. L., & Berman, N. G.	1996	Cognition and white matter hyperintensities in older depressed patients	The American Journal of Psychiatry, 15(10), 1280-1287	60	0.6	63.1	7.9		1			HDRS	20.2	5.5				165	0.35	64.4	9.6	1.1	1.7				1	1.4833	0.77	1.3333	0.5878	0	1	5	1	1		1.5	1
164	68	86	D	Lesser, I. M., Boone, K. B., Mehringer, M., Wohl, M. A., Miller, B. L., & Berman, N. G.	1996			35	0.31	57.3	6.1		3			HDRS	20.3	5.1				165	0.35	64.4	9.6	1.1	1.7				1	1.0857	0.284	1.3333	0.5878	0	1	5	1	1		1.5	1
154	63	79	D	Lin, H.-F., Kuo, Y-T., Chiang, I.-C., Chen, H.-M., & Chen, C.-S.	2005	Structural Abnormality on Brain Magnetic Resonance Imaging in Late-onset Major Depressive Disorder	Kaohsiung Journal of Medical Sciences, 21(9), 405-411	37	0.378	72.7	3.6	63.7	1	8.5		HRSD	21.9	6.6				18	0.333	70.2	4.7	3.7	3.3				3	1.52	0.8	0.88	0.86	0	1	1	1	1	2	3
155	63	79	D	Lin, H.-F., Kuo, Y-T., Chiang, I.-C., Chen, H.-M., & Chen, C.-S.	2005			37	0.378	72.7	3.6	63.7	1	8.5		HRSD	21.9	6.6				18	0.333	70.2	4.7	3.7	3.3				2	0.88	0.74	0.88	0.7	0	1	1	1	1	2	3
165	69	87	D	Lloyd, A. J., Ferrier, I. N., Barber, R., Gholkar, A., Young, A. H., & O’Brien, J. T.	2004	Hippocampal volume change in depression: late- and early-onset illness compared	The British Journal of Psychiatry , 184(6), 488-495	23	0.043	72.7	6.7	38.7	3			MADRS	29.7	8.1				39	0.256	73.1	6.7	2.3	2.1				13	12.3	7.1	13.1	10.8	0	0	1	1	0	3	1	1	5	0.5
166	69	87	D	Lloyd, A. J., Ferrier, I. N., Barber, R., Gholkar, A., Young, A. H., & O’Brien, J. T.	2004			23	0.043	72.7	6.7	38.7	3			MADRS	29.7	8.1				39	0.256	73.1	6.7	2.3	2.1				2	5.8	3.7	6.8	6.4	0	0	1	1	0	3	1	1	5	0.5
167	69	87	D	Lloyd, A. J., Ferrier, I. N., Barber, R., Gholkar, A., Young, A. H., & O’Brien, J. T.	2004			23	0.043	72.7	6.7	38.7	3			MADRS	29.7	8.1				39	0.256	73.1	6.7	2.3	2.1				3	3.2	1.7	2.9	1.6	0	0	1	1	0	3	1	1	5	0.5
168	69	88	D	Lloyd, A. J., Ferrier, I. N., Barber, R., Gholkar, A., Young, A. H., & O’Brien, J. T.	2004			28	0.321	75.1	5.8	72	1			MADRS	31.2	6.3				39	0.256	73.1	6.7	2.3	2.1				13	13.9	7.8	13.1	10.8	0	0	1	1	0	3	1	1	5	0.5
169	69	88	D	Lloyd, A. J., Ferrier, I. N., Barber, R., Gholkar, A., Young, A. H., & O’Brien, J. T.	2004			28	0.321	75.1	5.8	72	1			MADRS	31.2	6.3				39	0.256	73.1	6.7	2.3	2.1				2	7.2	5.1	6.8	6.4	0	0	1	1	0	3	1	1	5	0.5
170	69	88	D	Lloyd, A. J., Ferrier, I. N., Barber, R., Gholkar, A., Young, A. H., & O’Brien, J. T.	2004			28	0.321	75.1	5.8	72	1			MADRS	31.2	6.3				39	0.256	73.1	6.7	2.3	2.1				3	3.6	1.9	2.9	1.6	0	0	1	1	0	3	1	1	5	0.5
171	70	89	B	Lloyd, A. J., Moore, P. B., Cousins, D. A., Thompson, J. M., McAllister, V. L., Hughes, J. H., Ferrier, I. N., & Young, A. H.	2009	White matter lesions in euthymic patients with bipolar disorder	Acta Psychiatrica Scandinavica, 120(6), 481–491	48	0.458	44.5	8.9		4		0.229						0.375	47	0.404	45.8	8.6					0.191	3	1.8	1.4	1.4	0.7	1	1	1	1	1	3	1.5	1	5	2
172	70	89	B	Lloyd, A. J., Moore, P. B., Cousins, D. A., Thompson, J. M., McAllister, V. L., Hughes, J. H., Ferrier, I. N., & Young, A. H.	2009			48	0.458	44.5	8.9		4		0.229						0.375	47	0.404	45.8	8.6					0.191	2	3	4.9	2	3.5	1	1	1	1	1	3	1.5	1	5	2
173	70	89	B	Lloyd, A. J., Moore, P. B., Cousins, D. A., Thompson, J. M., McAllister, V. L., Hughes, J. H., Ferrier, I. N., & Young, A. H.	2009			48	0.458	44.5	8.9		4		0.229						0.375	47	0.404	45.8	8.6					0.191	12	0.1	0.4	0.1	0.3	1	1	1	1	1	3	1.5	1	5	2
24	13	17	D	Madsen, K., Hasselbalch, B. J., Frederiksen, K. S., Haahr, M. E., Gade, A., Law, I., Price, J. C., Knudsen, G. M., Kessing, L. V., & Hasselbalch, S. G.	2012	Lack of association between prior depressive episodes and cerebral [11C]PiB binding	Neurobiology of Aging, 33, 2334–2342	14		56			3									14		63							2	1	0.58	0.91	0.66	1	1	1	1	0	2	3
25	13	17	D	Madsen, K., Hasselbalch, B. J., Frederiksen, K. S., Haahr, M. E., Gade, A., Law, I., Price, J. C., Knudsen, G. M., Kessing, L. V., & Hasselbalch, S. G.	2012			14		56			3									14		63							3	1.02	0.8	1.17	0.66	1	1	1	1	0	2	3
26	13	18	D	Madsen, K., Hasselbalch, B. J., Frederiksen, K. S., Haahr, M. E., Gade, A., Law, I., Price, J. C., Knudsen, G. M., Kessing, L. V., & Hasselbalch, S. G.	2012			14		67			1									14		63							2	1.58	0.86	0.91	0.66	1	1	1	1	0	2	3
27	13	18	D	Madsen, K., Hasselbalch, B. J., Frederiksen, K. S., Haahr, M. E., Gade, A., Law, I., Price, J. C., Knudsen, G. M., Kessing, L. V., & Hasselbalch, S. G.	2012			14		67			1									14		63							3	1.83	0.89	1.17	0.66	1	1	1	1	0	2	3
28	14	19	D	Mak, E., Colloby, S. J., Thomas, A., & O’Brien, J. T.	2016	The segregated connectome of late-life depression: a combined cortical thickness and structural covariance analysis	Neurobiology of Aging, 48, 212-221	33	0.2424	73.6	5.2	51	2	1.9								25	0.28	73.6	6						3	6.1	5.5	6.7	7.8	1		2	2	0		3
29	14	19	D	Mak, E., Colloby, S. J., Thomas, A., & O’Brien, J. T.	2016			33	0.2424	73.6	5.2	51	2	1.9								25	0.28	73.6	6						2	2.2	3.4	3.6	8.7	1		2	2	0		3
176	73	91	B1	McDonald, W. M., Krishnan, K. R. R., Doraiswamy, P. M., & Blazer, D. G.	1991	Occurrence of Subcortical Hyperintensities in Elderly Subjects With Mania	Psychiatry Research: Neuroimaging, 40(4), 211-220	12	0.5	68.3	7	62	1									12	0.5	68.7	7						1	2.5	0.5222	1.4167	1.0836	1	1	5	1	1		1.5	1	5	2.5
178	73	92	B	McDonald, W. M., Tupler, L., Marsteller, F., Figiel, G., DiSouza, S., Nemeroff, C., & Krishnan, K. R. R.	1999	Hyperintense Lesions on Magnetic Resonance Images in Bipolar Disorder	Biological Psychiatry, 45(8), 965–971	38	0.5	35.9	11		1									30	0.53	34.4	8						3	0.2105	0.528	0	0	1	1	1	1	1	6	1.5	1	5	2.5
179	73	92	B	McDonald, W. M., Tupler, L., Marsteller, F., Figiel, G., DiSouza, S., Nemeroff, C., & Krishnan, K. R. R.	1999			38	0.5	35.9	11		1									30	0.53	34.4	8						13	1	0.5199	0.5	0.6297	1	1	1	1	1	6	1.5	1	5	2.5
180	73	92	B	McDonald, W. M., Tupler, L., Marsteller, F., Figiel, G., DiSouza, S., Nemeroff, C., & Krishnan, K. R. R.	1999			38	0.5	35.9	11		1									30	0.53	34.4	8						2	0.2632	0.4463	0	0	1	1	1	1	1	6	1.5	1	5	2.5
181	73	92	B	McDonald, W. M., Tupler, L., Marsteller, F., Figiel, G., DiSouza, S., Nemeroff, C., & Krishnan, K. R. R.	1999			38	0.5	35.9	11		1									30	0.53	34.4	8						5	0.1842	0.4565	0	0	1	1	1	1	1	6	1.5	1	5	2.5
182	73	93	B	McDonald, W. M., Tupler, L., Marsteller, F., Figiel, G., DiSouza, S., Nemeroff, C., & Krishnan, K. R. R.	1999			32	0.34	68.2	9		2									40	0.4	67.3	7						3	0.6875	0.7803	0.6	0.6718	1	1	1	1	1	6	1.5	1	5	2.5
183	73	93	B	McDonald, W. M., Tupler, L., Marsteller, F., Figiel, G., DiSouza, S., Nemeroff, C., & Krishnan, K. R. R.	1999			32	0.34	68.2	9		2									40	0.4	67.3	7						13	1.3125	0.6445	1.5	0.5991	1	1	1	1	1	6	1.5	1	5	2.5
184	73	93	B	McDonald, W. M., Tupler, L., Marsteller, F., Figiel, G., DiSouza, S., Nemeroff, C., & Krishnan, K. R. R.	1999			32	0.34	68.2	9		2									40	0.4	67.3	7						2	0.7188	0.4568	0.45	0.5038	1	1	1	1	1	6	1.5	1	5	2.5
185	73	93	B	McDonald, W. M., Tupler, L., Marsteller, F., Figiel, G., DiSouza, S., Nemeroff, C., & Krishnan, K. R. R.	1999			32	0.34	68.2	9		2									40	0.4	67.3	7						5	0.4063	0.7121	0.075	0.2667	1	1	1	1	1	6	1.5	1	5	2.5
186	74	94	D	Miller, D. S., Kumar, A., Yousem, D. M., & Gottlieb, G. L.	1994	MRI High-Intensity Signals in Late-Life Depression and Alzheimer's Disease: A Comparison of Subjects Without Major Vascular Risk Factors	The American Journal of Geriatric Psychiatry, 2(4), 332-337	19	0.316	69	6		2						0	0		23	0.478	68	8			0	0		2	0.2632	0.562	0.087	0.2881	1	1	1	1	1	6	1.5		5	0
187	74	94	D	Miller, D. S., Kumar, A., Yousem, D. M., & Gottlieb, G. L.	1994			19	0.316	69	6		2						0	0		23	0.478	68	8			0	0		3	0.1579	0.3746	0.2174	0.5184	1	1	1	1	1	6	1.5		5	0
188	74	94	D	Miller, D. S., Kumar, A., Yousem, D. M., & Gottlieb, G. L.	1994			19	0.316	69	6		2						0	0		23	0.478	68	8			0	0		5	0	0	0.087	0.2881	1	1	1	1	1	6	1.5		5	0
189	75	95	B	Moore, P. B., Shepherd, D. J., Eccleston, D., Macmillan, I. C., Goswami, U., McAllister, V. L., & Ferrier, I. N.	2001	Cerebral white matter lesions in bipolar affective disorder: relationship to outcome	The British Journal of Psychiatry, 178(2), 172-176	15	0.467	42.1	13.9	26.3	4	15.8								15	0.467	41.9	12.6						2	0.6667	0.8165	0	0	0	1	1	1	1	2	0.5	1	7	1
190	75	95	B	Moore, P. B., Shepherd, D. J., Eccleston, D., Macmillan, I. C., Goswami, U., McAllister, V. L., & Ferrier, I. N.	2001			15	0.467	42.1	13.9	26.3	4	15.8								15	0.467	41.9	12.6						3	0.9333	0.7988	0.5333	0.6399	0	1	1	1	1	2	0.5	1	7	1
191	75	96	B	Moore, P. B., Shepherd, D. J., Eccleston, D., Macmillan, I. C., Goswami, U., McAllister, V. L., & Ferrier, I. N.	2001			14	0.571	47.4	10.1	31.4	4	16								15	0.467	41.9	12.6						2	0.1429	0.5349	0	0	0	1	1	1	1	2	0.5	1	7	1
192	75	96	B	Moore, P. B., Shepherd, D. J., Eccleston, D., Macmillan, I. C., Goswami, U., McAllister, V. L., & Ferrier, I. N.	2001			14	0.571	47.4	10.1	31.4	4	16								15	0.467	41.9	12.6						3	0.5714	0.5136	0.5333	0.6399	0	1	1	1	1	2	0.5	1	7	1
193	76	97	D	O'Brien, J., Desmond, P., Ames, D., Schweitzer, I., Harrigan, S., & Tress, B.	1996	A magnetic resonance imaging study of white matter lesions in depression and Alzheimer's disease	The British Journal of Psychiatry, 168(4), 477-485	60	0.3	71.2	7.9		4			HRSD	25	6				39	0.513	71.4	11	1.5	1.8				2	1.633	1.041	1	1	0	1	1	1	1	2	0.3	5
194	76	97	D	O'Brien, J., Desmond, P., Ames, D., Schweitzer, I., Harrigan, S., & Tress, B.	1996			60	0.3	71.2	7.9		4			HRSD	25	6				39	0.513	71.4	11	1.5	1.8				3	1.4667	1.2139	1	1.1471	0	1	1	1	1	2	0.3	5
195	77	98	D	Oh, B. H., & Cheon, J. S.	2004	White matter lesions on magnetic resonance imaging in late-life depression	Psychogeriatrics, 4(3), 72-81	32	0.469	63.1	10		2						0.313	0.94	0.313	25	0.24	60.5	6.6			0.16	0.04	0.08	3	1.0625	1.0453	0.52	0.5099	0	0	1	1	1	2	1
196	77	98	D	Oh, B. H., & Cheon, J. S.	2004			32	0.469	63.1	10		2						0.313	0.94	0.313	25	0.24	60.5	6.6			0.16	0.04	0.08	2	1.4688	0.8793	0.76	0.5228	0	0	1	1	1	2	1
210	83	106	D	Paranthaman, R., Greenstein, A. S., Burns, A. S., Cruickshank, J. K., Heagerty, A. M., Jackson, A., Malik, R. A., Scott, M. L. J., & Baldwin, R. C.	2010	Vascular Function in Older Adults with Depressive Disorder	Biological Psychiatry, 68(2), 133-139	25	0.32	72.6	4.4	60	2		0.88	MADRS	14.8	10.2	0.6	0.08	0.16	21	0.39	72.2	6.5	2.6	1.9	0.761	0.143	0.095	3	2.28	1.9	2.33	2.48	0	1	1	1	0	3	1.5		3	0
211	83	106	D	Paranthaman, R., Greenstein, A. S., Burns, A. S., Cruickshank, J. K., Heagerty, A. M., Jackson, A., Malik, R. A., Scott, M. L. J., & Baldwin, R. C.	2010			25	0.32	72.6	4.4	60	2		0.88	MADRS	14.8	10.2	0.6	0.08	0.16	21	0.39	72.2	6.5	2.6	1.9	0.761	0.143	0.095	2	6.16	4.85	6.67	6.29	0	1	1	1	0	3	1.5		3	0
212	83	106	D	Paranthaman, R., Greenstein, A. S., Burns, A. S., Cruickshank, J. K., Heagerty, A. M., Jackson, A., Malik, R. A., Scott, M. L. J., & Baldwin, R. C.	2010			25	0.32	72.6	4.4	60	2		0.88	MADRS	14.8	10.2	0.6	0.08	0.16	21	0.39	72.2	6.5	2.6	1.9	0.761	0.143	0.095	11	0.52	1.41	0.86	1.8	0	1	1	1	0	3	1.5		3	0
213	83	106	D	Paranthaman, R., Greenstein, A. S., Burns, A. S., Cruickshank, J. K., Heagerty, A. M., Jackson, A., Malik, R. A., Scott, M. L. J., & Baldwin, R. C.	2010			25	0.32	72.6	4.4	60	2		0.88	MADRS	14.8	10.2	0.6	0.08	0.16	21	0.39	72.2	6.5	2.6	1.9	0.761	0.143	0.095	12	0.8	1.22	1.52	3.23	0	1	1	1	0	3	1.5		3	0
30	15	20	D	Patel, M. J., Boada, F. E., Price, J. C., Sheu, L. K., Tudorascu, D. L., Reynolds III, C. F., & Aizenstein, H. J.	2012	Association of small vessel ischemic white matter changes with BOLD fMRI imaging in the elderly	Psychiatry Research, 204(2-3), 117–122	33	0.394	68.3	6.6		2									41	0.293	71.7	7.9						1	0.00197	0.0034	0.00379	0.0067	0		2	2	1		3	1	3
31	16	21	D	Payne, M. E., Pierce, C. W., McQuoid, D. R., Steffens, D. C., & Anderson, J. J. B.	2013	Serum Ionized Calcium May Be Related to White Matter Lesion Volumes in Older Adults: A Pilot Study	Nutrients, 5(6), 2192-2205	29	0.48	68.3	6.5		2						0.38			13	0.69	68.3	6.5						1	5.4	3.3	5.3	4.2	0		2	2	1		3
198	79	100	B	Pillai, J. J., Friedman, L., Stuve, T. A., Trinidad, S., Jesberger, J. A., Lewin, J. S., Findling, R. L., Swales, T. P., & Schulz, S. C.	2002	Increased presence of white matter hyperintensities in adolescent patients with bipolar disorder	Psychiatry Research: Neuroimaging, 114(1), 51–56	15	0.533	15	2.4	10	5	5								16	0.563	16	1.8						1	0.6667	0.488	0.3125	0.4787	0	1	1	1	1	6	1.5	1	5	2
249	86	118	D	Potter, G. G., Blackwell, A. D., McQuoid, D. R., Payne, M. E., Steffens, D. C., Sahakian, B. J., Welsh-Bohme, K. A., & Krishnan, K. R. R.	2007	Prefrontal White Matter Lesions and Prefrontal Task Impersistence in Depressed and Nondepressed Elders	Neuropsychopharmacology, 32, 2135–2142	83	0.41	71.61	6.25		2		0.7							47	0.37	74.06	6.41						13	0.094	0.026	0.0625	0.1859	0		3	2	1		1.5	1	3	0
214	84	107	D	Rabins, P. V., Pearlson, G. D., Aylward, E., Kumar, A. J., & Dowell, K.	1991	Cortical Magnetic Resonance Imaging Changes in Elderly Inpatients With Major Depression	The American Journal of Psychiatry, 148(5), 617-620	21					2									16									12	0.65	0.67	0.14	0.36	1	1	1	1	0	6	1.5
215	84	107	D	Rabins, P. V., Pearlson, G. D., Aylward, E., Kumar, A. J., & Dowell, K.	1991			21					2									16									1	0.9	0.89	0.5	0.51	1	1	1	1	0	6	2.5
216	84	107	D	Rabins, P. V., Pearlson, G. D., Aylward, E., Kumar, A. J., & Dowell, K.	1991			21					2									16									3	1.05	1.24	0.69	1.03	1	1	1	1	0	6	3.5
33	18	23	B	Rej, S., Butters, M. A., Aizenstein, H. J., Begley, A., Tsay, J., Reynolds III, C. F., Mulsant, B. H., & Gildengers, A.	2014	Neuroimaging and neurocognitive abnormalities associated with bipolar disorder in old age	International Journal of Geriatric Psychiatry, 29, 421–427	27	0.259	68.6	8.1		2	44.8								12	0.5	67.1	7.4						1	0.0004	0.0004	0.001	0.001	0		2	2	1		1.5
34	19	24	B	Rolstad, S., Abé, C., Olsson, E., Eckerström, C., & Landén, M.	2016	Cognitive reserve lessens the burden of white matter lesions on executive functions in bipolar disorder	Psychological Medicine, 46, 3095–3104	75	0.414	36.5	12.2		4		0.267							83	0.506	38.6	14.5						2	1.6	0.7	1.4	0.6	1		2	2	1		1.5
199	80	101	B	Sassi, R. B., Brambilla, P., Nicoletti, M., Mallinger, A. G., Frank, E., Kupfer, D. J., Keshavan, M. S., & Soares, J. C.	2003	White matter hyperintensities in bipolar and unipolar patients with relatively mild-to-moderate illness severity	Journal of Affective Disorders, 77(3), 237–245	24	0.625	34.2	9.9	20	4	14.6								38	0.632	36.8	9.7						3	0.4167	0.5036	0.6053	0.6384	0	1	1	1	1	2	1.5	1	5	0
200	80	101	B	Sassi, R. B., Brambilla, P., Nicoletti, M., Mallinger, A. G., Frank, E., Kupfer, D. J., Keshavan, M. S., & Soares, J. C.	2003			24	0.625	34.2	9.9	20	4	14.6								38	0.632	36.8	9.7						2	0.0833	0.2823	0.1053	0.311	0	1	1	1	1	2	1.5	1	5	0
201	80	101	B	Sassi, R. B., Brambilla, P., Nicoletti, M., Mallinger, A. G., Frank, E., Kupfer, D. J., Keshavan, M. S., & Soares, J. C.	2003			24	0.625	34.2	9.9	20	4	14.6								38	0.632	36.8	9.7						5	0.0417	0.2041	0.0789	0.2733	0	1	1	1	1	2	1.5	1	5	0
202	80	102	D	Sassi, R. B., Brambilla, P., Nicoletti, M., Mallinger, A. G., Frank, E., Kupfer, D. J., Keshavan, M. S., & Soares, J. C.	2003			17	0.059	42.8	9.2	30	4	12								38	0.632	36.8	9.7						3	0.4118	0.6183	0.6053	0.6384	0	1	1	1	1	2	1.5	1	5	0
203	80	102	D	Sassi, R. B., Brambilla, P., Nicoletti, M., Mallinger, A. G., Frank, E., Kupfer, D. J., Keshavan, M. S., & Soares, J. C.	2003			17	0.059	42.8	9.2	30	4	12								38	0.632	36.8	9.7						2	0.1765	0.393	0.1053	0.311	0	1	1	1	1	2	1.5	1	5	0
204	80	102	D	Sassi, R. B., Brambilla, P., Nicoletti, M., Mallinger, A. G., Frank, E., Kupfer, D. J., Keshavan, M. S., & Soares, J. C.	2003			17	0.059	42.8	9.2	30	4	12								38	0.632	36.8	9.7						5	0.1176	0.3321	0.0789	0.2733	0	1	1	1	1	2	1.5	1	5	0
37	21	26	D	Schwichtenberg, J., Al-Zghloul, M., Kerl, H. U., Wenz, H., Hausner, L., Frölich, L., Groden, C., & Förster, A.	2017	Late-onset major depression is associated with age-related white matter lesions in the brainstem	International Journal of Geriatric Psychiatry, 32(4), 446–454	45	0.378	73.7	6.3		1						0.644	0.067	0.133	42	0.476	72	6.7			0.548	0.095	0.048	13	14.33	15.84	11.03	19.24	0	1	3	2	1		3		5
38	21	26	D	Schwichtenberg, J., Al-Zghloul, M., Kerl, H. U., Wenz, H., Hausner, L., Frölich, L., Groden, C., & Förster, A.	2017			45	0.378	73.7	6.3		1						0.644	0.067	0.133	42	0.476	72	6.7			0.548	0.095	0.048	13	2.07	1.35	1.52	1.1	0	1	3	2	1		3		5
39	22	27	D	Sexton,, C. E., Allan, C. L., Le Masurier, M., McDermott, L. M., Kalu, U. G., Herrmann, L. L., Mäurer, M., Bradley, K. M., Mackay, C. E., & Ebmeier, K. P.	2012	Magnetic Resonance Imaging in Late-Life Depression: Multimodal Examination of Network Disruption	Archives of General Psychiatry, 69(7), 680-689	36	0.333	71.83	7.71	45.39	2		0.1944							25	0.36	71.76	7.3						3	0.4516	0.568	0.76	0.7234	0	1	1	1	0	2	3
40	22	27	D	Sexton,, C. E., Allan, C. L., Le Masurier, M., McDermott, L. M., Kalu, U. G., Herrmann, L. L., Mäurer, M., Bradley, K. M., Mackay, C. E., & Ebmeier, K. P.	2012			36	0.333	71.83	7.71	45.39	2		0.1944							25	0.36	71.76	7.3						2	0.5484	0.6752	0.6	0.7071	0	1	1	1	0	2	3
205	81	103	B1	Silverstone, T., McPherson, H., Li, Q., & Doyle, T.	2003	Deep white matter hyperintensities in patients with bipolar depression, unipolar depression and age-matched control subjects	Bipolar Disorders, 5(1), 53–57	13	0.538	40.2		25.9	4	14.2								19	0.474	35.9							2	1.5385	0.5189	1.2631	0.4524	1	1	1	1	1	1	0.5	5	5	2.5
206	81	103	B1	Silverstone, T., McPherson, H., Li, Q., & Doyle, T.	2003			13	0.538	40.2		25.9	4	14.2								19	0.474	35.9							3	1.2308	0.4285	1.4211	0.5073	1	1	1	1	1	1	0.5	5	5	2.5
207	81	104	D	Silverstone, T., McPherson, H., Li, Q., & Doyle, T.	2003			11	0.357	34.4		26.6	3	7.8								19	0.474	35.9							2	1.2727	0.4671	1.2631	0.4524	1	1	1	1	1	1	0.5	5	5	2.5
208	81	104	D	Silverstone, T., McPherson, H., Li, Q., & Doyle, T.	2003			11	0.357	34.4		26.6	3	7.8								19	0.474	35.9							3	1.4545	0.5222	1.4211	0.5073	1	1	1	1	1	1	0.5	5	5	2.5
217	85	108	B	Tamashiro, J. H., Zung, S., Zanetti, M. V., de Castro, C. C., Vallada, H., Busatto, G. F., & Alves, T. C.	2008	Increased rates of white matter hyperintensities in late-onset bipolar disorder	Bipolar Disorders, 10(7), 765–775	10	0.5	73.6	4.09	62.4	1						0.6	0.1	0.1	24	0.25	69	7.22			0.5	0.125	0.25	3FL	0.9	0.88	0.33	0.48	0	1	1	1	1	3	1.5		6	0.6
218	85	108	B	Tamashiro, J. H., Zung, S., Zanetti, M. V., de Castro, C. C., Vallada, H., Busatto, G. F., & Alves, T. C.	2008			10	0.5	73.6	4.09	62.4	1						0.6	0.1	0.1	24	0.25	69	7.22			0.5	0.125	0.25	2FL	3.5	2.17	1.17	1.71	0	1	1	1	1	3	1.5		6	0.6
219	85	108	B	Tamashiro, J. H., Zung, S., Zanetti, M. V., de Castro, C. C., Vallada, H., Busatto, G. F., & Alves, T. C.	2008			10	0.5	73.6	4.09	62.4	1						0.6	0.1	0.1	24	0.25	69	7.22			0.5	0.125	0.25	2PL	3.7	2.54	0.88	1.8	0	1	1	1	1	3	1.5		6	0.6
220	85	108	B	Tamashiro, J. H., Zung, S., Zanetti, M. V., de Castro, C. C., Vallada, H., Busatto, G. F., & Alves, T. C.	2008			10	0.5	73.6	4.09	62.4	1						0.6	0.1	0.1	24	0.25	69	7.22			0.5	0.125	0.25	6	0.4	0.7	0.13	0.45	0	1	1	1	1	3	1.5		6	0.6
221	85	108	B	Tamashiro, J. H., Zung, S., Zanetti, M. V., de Castro, C. C., Vallada, H., Busatto, G. F., & Alves, T. C.	2008			10	0.5	73.6	4.09	62.4	1						0.6	0.1	0.1	24	0.25	69	7.22			0.5	0.125	0.25	7	1.2	1.99	0.08	0.41	0	1	1	1	1	3	1.5		6	0.6
222	85	108	B	Tamashiro, J. H., Zung, S., Zanetti, M. V., de Castro, C. C., Vallada, H., Busatto, G. F., & Alves, T. C.	2008			10	0.5	73.6	4.09	62.4	1						0.6	0.1	0.1	24	0.25	69	7.22			0.5	0.125	0.25	8	0.5	0.71	0.21	0.72	0	1	1	1	1	3	1.5		6	0.6
223	85	108	B	Tamashiro, J. H., Zung, S., Zanetti, M. V., de Castro, C. C., Vallada, H., Busatto, G. F., & Alves, T. C.	2008			10	0.5	73.6	4.09	62.4	1						0.6	0.1	0.1	24	0.25	69	7.22			0.5	0.125	0.25	10	0.2	0.42	0.13	0.34	0	1	1	1	1	3	1.5		6	0.6
224	85	109	B	Tamashiro, J. H., Zung, S., Zanetti, M. V., de Castro, C. C., Vallada, H., Busatto, G. F., & Alves, T. C.	2008			49	0.306	67.78	4.44	38.31	3						0.408	0.163	0.265	24	0.25	69	7.22			0.5	0.125	0.25	3FL	0.61	0.64	0.33	0.48	0	1	1	1	1	3	1.5		6	0.6
225	85	109	B	Tamashiro, J. H., Zung, S., Zanetti, M. V., de Castro, C. C., Vallada, H., Busatto, G. F., & Alves, T. C.	2008			49	0.306	67.78	4.44	38.31	3						0.408	0.163	0.265	24	0.25	69	7.22			0.5	0.125	0.25	2FL	1.71	2.14	1.17	1.71	0	1	1	1	1	3	1.5		6	0.6
226	85	109	B	Tamashiro, J. H., Zung, S., Zanetti, M. V., de Castro, C. C., Vallada, H., Busatto, G. F., & Alves, T. C.	2008			49	0.306	67.78	4.44	38.31	3						0.408	0.163	0.265	24	0.25	69	7.22			0.5	0.125	0.25	2PL	1.12	1.86	0.88	1.8	0	1	1	1	1	3	1.5		6	0.6
227	85	109	B	Tamashiro, J. H., Zung, S., Zanetti, M. V., de Castro, C. C., Vallada, H., Busatto, G. F., & Alves, T. C.	2008			49	0.306	67.78	4.44	38.31	3						0.408	0.163	0.265	24	0.25	69	7.22			0.5	0.125	0.25	6	0.14	0.87	0.13	0.45	0	1	1	1	1	3	1.5		6	0.6
228	85	109	B	Tamashiro, J. H., Zung, S., Zanetti, M. V., de Castro, C. C., Vallada, H., Busatto, G. F., & Alves, T. C.	2008			49	0.306	67.78	4.44	38.31	3						0.408	0.163	0.265	24	0.25	69	7.22			0.5	0.125	0.25	7	0.24	0.99	0.08	0.41	0	1	1	1	1	3	1.5		6	0.6
229	85	109	B	Tamashiro, J. H., Zung, S., Zanetti, M. V., de Castro, C. C., Vallada, H., Busatto, G. F., & Alves, T. C.	2008			49	0.306	67.78	4.44	38.31	3						0.408	0.163	0.265	24	0.25	69	7.22			0.5	0.125	0.25	8	0.45	1.43	0.21	0.72	0	1	1	1	1	3	1.5		6	0.6
230	85	109	B	Tamashiro, J. H., Zung, S., Zanetti, M. V., de Castro, C. C., Vallada, H., Busatto, G. F., & Alves, T. C.	2008			49	0.306	67.78	4.44	38.31	3						0.408	0.163	0.265	24	0.25	69	7.22			0.5	0.125	0.25	10	0.41	1.43	0.13	0.34	0	1	1	1	1	3	1.5		6	0.6
231	86	110	D	Taylor, W. D., MacFall, J. R., Payne, M. E., McQuoid, D. R., Steffens, D. C., Provenzale, J. M., & Krishnan, K. R. R.	2007	Orbitofrontal cortex volume in late life depression: influence of hyperintense lesions and genetic polymorphisms	Psychological Medicine, 37(12), 1763–1773	226	0.336	70	7.4	45.4	2									144	0.306	70.3	6.5						1	6.97	10.5	4.66	6.2	0		3	2	1		1.5	1	3	0
232	86	110	D	Taylor, W. D., MacFall, J. R., Payne, M. E., McQuoid, D. R., Steffens, D. C., Provenzale, J. M., & Krishnan, K. R. R.	2007			226	0.336	70	7.4	45.4	2									144	0.306	70.3	6.5						5	0.27	0.5	0.17	0.3	0		3	2	1		1.5	1	3	0
247	92	117	D	Taylor, W. D., MacFall, J. R., Payne, M. E., McQuoid, D. R., Steffens, D. C., Provenzale, J. M., & Krishnan, K. R. R.	2005	Greater MRI lesion volumes in elderly depressed subjects than in control subjects	Psychiatry Research: Neuroimaging, 139, 1 – 7	253	0.328	70.48	6.23		2						0.399	0.091		146	0.295	69.85	7.54			0.26	0.753		1	7.22	10.71	4.87	6.47	0		3	2	1		1.5	1	3	0
248	92	117	D	Taylor, W. D., MacFall, J. R., Payne, M. E., McQuoid, D. R., Steffens, D. C., Provenzale, J. M., & Krishnan, K. R. R.	2005			253	0.328	70.48	6.23		2						0.399	0.091		146	0.295	69.85	7.54			0.26	0.753		5	0.3	0.75	0.18	0.29	0		3	2	1		1.5	1	3	0
42	24	29	D	Taylor, W. D., McQuoid, D. R., Payne, M. E., Zannas, A. S., MacFall, J. R., & Steffens, D. C.	2014	Hippocampus atrophy and the longitudinal course of late-life depression	American Journal of Geriatric Psychiatry, 22(12), 1504–1512	47	0.404	69.3	6.5		2		1							70	0.286	69.7	6.2						1	6.9	9.3	4.9	5.4	0		2	2	0		1.5
43	24	30	D	Taylor, W. D., McQuoid, D. R., Payne, M. E., Zannas, A. S., MacFall, J. R., & Steffens, D. C.	2014			18	0.323	70	6.1		2		1							70	0.286	69.7	6.2						1	3.7	2.2	4.9	5.4	0		2	2	0		1.5
44	24	31	D	Taylor, W. D., McQuoid, D. R., Payne, M. E., Zannas, A. S., MacFall, J. R., & Steffens, D. C.	2014			27	0.444	72.1	7.3		2		1							70	0.286	69.7	6.2						1	6.2	7.4	4.9	5.4	0		2	2	0		1.5
41	23	28	D	Taylor, W. D., Zhao, Z., Ashley-Koch, A., Payne, M. E., Steffens, D. C., Krishnan, R. R., Hauser, E., & MacFall, J. R.,	2013	Fiber Tract-Specific White Matter Lesion Severity: Findings in Late-Life Depression and by AGTR1 A1166C Genotype	Human Brain Mapping, 34(2), 295-303	54	0.352	68.9	5.6		2									37	0.351	73.8	5.8						1	8.7	8.3	8.8	12.7	0		2	2	0		3		2
233	86	111	D	Taylor, W. D., Züchner, S., McQuoid, D. R., Payne, M. E., MacFall, J. R., Steffens, D. C., & Krishnan, K. R. R.	2008	The Brain-Derived Neurotrophic Factor VAL66MET Polymorphism and Cerebral White Matter Hyperintensities in Late-Life Depression	The American Journal of Geriatric Psychiatry, 16(4), 263-271	199	0.347	70	7.8	45.2	2									113	0.274	69.9	5.6						1	7	11	4.8	6.4			2	2	1		1.5	1
234	86	111	D	Taylor, W. D., Züchner, S., McQuoid, D. R., Payne, M. E., MacFall, J. R., Steffens, D. C., & Krishnan, K. R. R.	2008			199	0.347	70	7.8	45.2	2									113	0.274	69.9	5.6						5	0.28	0.5	0.16	0.23			2	2	1		1.5	1
45	25	32	B2	Tighe, S. K., Reading, S. A., Rivkin, P., Caffo, B., Schweizer, B., Pearlson, G., Potash, J. B., DePaulo, J. R., & Bassett, S. S.	2012	Total white matter hyperintensity volume in bipolar disorder patients and their healthy relatives	Bipolar Disorders, 14, 888–893	12	0.583	33.75	2.35		4									31	0.452	32.97	1.99						1	0.037	0.035	0.015	0.009	0	1	3	2	1		1.5	1	5	0
46	25	33	B1	Tighe, S. K., Reading, S. A., Rivkin, P., Caffo, B., Schweizer, B., Pearlson, G., Potash, J. B., DePaulo, J. R., & Bassett, S. S.	2012			7	0.286	31.43	2.39		4									31	0.452	32.97	1.99						1	0.063	0.046	0.015	0.009	0	1	3	2	1		1.5	1	5	0
47	25	34	B1	Tighe, S. K., Reading, S. A., Rivkin, P., Caffo, B., Schweizer, B., Pearlson, G., Potash, J. B., DePaulo, J. R., & Bassett, S. S.	2012			26	0.385	34.69	1.64		4									31	0.452	32.97	1.99						1	0.085	0.032	0.015	0.009	0	1	3	2	1		1.5	1	5	0
235	88	112	D	Tupler, L. A., Krishnan, K. R. R., McDonald, W. M., Dombeck, C. B., D’Souza, S., & Steffens, D. C.	2002	Anatomic location and laterality of MRI signal hyperintensities in late-life depression	Journal of Psychosomatic Research, 53(2), 665-676	69	0.232	70.5	8.1		1									37	0.351	65.9	9.4						3	2.1304	0.8028	1.5676	0.6888	0	1	1	1	1	2	1.5	1	5	2.5
236	88	112	D	Tupler, L. A., Krishnan, K. R. R., McDonald, W. M., Dombeck, C. B., D’Souza, S., & Steffens, D. C.	2002			69	0.232	70.5	8.1		1									37	0.351	65.9	9.4						2	1.942	1.0556	1.2162	0.9468	0	1	1	1	1	2	1.5	1	5	2.5
237	88	112	D	Tupler, L. A., Krishnan, K. R. R., McDonald, W. M., Dombeck, C. B., D’Souza, S., & Steffens, D. C.	2002			69	0.232	70.5	8.1		1									37	0.351	65.9	9.4						5	1.4348	1.3447	0.2703	0.6078	0	1	1	1	1	2	1.5	1	5	2.5
238	88	113	D	Tupler, L. A., Krishnan, K. R. R., McDonald, W. M., Dombeck, C. B., D’Souza, S., & Steffens, D. C.	2002			46	0.326	61.1	12.2		3									37	0.351	65.9	9.4						3	1.3913	0.8022	1.5676	0.6888	0	1	1	1	1	2	1.5	1	5	2.5
239	88	113	D	Tupler, L. A., Krishnan, K. R. R., McDonald, W. M., Dombeck, C. B., D’Souza, S., & Steffens, D. C.	2002			46	0.326	61.1	12.2		3									37	0.351	65.9	9.4						2	0.9782	1.1641	1.2162	0.9468	0	1	1	1	1	2	1.5	1	5	2.5
240	88	113	D	Tupler, L. A., Krishnan, K. R. R., McDonald, W. M., Dombeck, C. B., D’Souza, S., & Steffens, D. C.	2002			46	0.326	61.1	12.2		3									37	0.351	65.9	9.4						5	0.7391	1.1242	0.2703	0.6078	0	1	1	1	1	2	1.5	1	5	2.5
48	26	35	D	Vasudev, A., Saxby, B. K., O’Brien, J. T., Colloby, S. J., Firbank, M. J., Brooker, H., Wesnes, K., & Thomas, A. J.	2012	Relationship Between Cognition, Magnetic Resonance White Matter Hyperintensities, and Cardiovascular Autonomic Changes in Late-Life Depression	American Journal of Geriatric Psychiatry, 20(8), 691–699	41	0.246	74	5.9		2		0.853							32	0.375	74.6	6.3						3	0.66	0.66	0.62	0.66	0		2	2	1		3	2
49	26	35	D	Vasudev, A., Saxby, B. K., O’Brien, J. T., Colloby, S. J., Firbank, M. J., Brooker, H., Wesnes, K., & Thomas, A. J.	2012			41	0.246	74	5.9		2		0.853							32	0.375	74.6	6.3						2	0.21	0.29	0.32	0.7	0		2	2	1		3	2
241	89	114	D	Weber, K., Giannakopoulos, P., Delaloye, C., de Bilbao, F., Moy, G., Moussa, A., Rubio, M. M., Ebbing, K., Meuli, R., Lazeyras, F., Meiler-Mititelu, C., Herrmann, F. R., Gold, G., & Canuto, A.	2010	Volumetric MRI changes, cognition and personality traits in old age depression	Journal of Affective Disorders, 124(3), 275–282	38	0.19	66.11	6.22	37.76	3	28.45	0.47							62	0.23	71.1	7.26						3	0.7	0.95	0.89	1.13	0	1	1	1	0	3	3	3
242	89	114	D	Weber, K., Giannakopoulos, P., Delaloye, C., de Bilbao, F., Moy, G., Moussa, A., Rubio, M. M., Ebbing, K., Meuli, R., Lazeyras, F., Meiler-Mititelu, C., Herrmann, F. R., Gold, G., & Canuto, A.	2010			38	0.19	66.11	6.22	37.76	3	28.45	0.47							62	0.23	71.1	7.26						2	3	4.11	3.36	4.73	0	1	1	1	0	3	3	3
243	89	114	D	Weber, K., Giannakopoulos, P., Delaloye, C., de Bilbao, F., Moy, G., Moussa, A., Rubio, M. M., Ebbing, K., Meuli, R., Lazeyras, F., Meiler-Mititelu, C., Herrmann, F. R., Gold, G., & Canuto, A.	2010			38	0.19	66.11	6.22	37.76	3	28.45	0.47							62	0.23	71.1	7.26						12	0.15	0.46	0.48	1.02	0	1	1	1	0	3	3	3
244	89	114	D	Weber, K., Giannakopoulos, P., Delaloye, C., de Bilbao, F., Moy, G., Moussa, A., Rubio, M. M., Ebbing, K., Meuli, R., Lazeyras, F., Meiler-Mititelu, C., Herrmann, F. R., Gold, G., & Canuto, A.	2010			38	0.19	66.11	6.22	37.76	3	28.45	0.47							62	0.23	71.1	7.26						11	0	0	0.02	0.15	0	1	1	1	0	3	3	3
50	27	36	D	Wu, R.-H., Feng, C., Xu, Y., Hua, T., Liu, X.-Y., & Fang, M.	2014	Late-onset Depression in the Absence of Stroke: Associated with Silent Brain Infarctions, Microbleeds and Lesion Locations	International Journal of Medical Sciences, 11(6), 587–592	65	0.2923	73.17	4.36		1						0.723	0.354		270	0.5185	72.28	5.65			0.615	0.278		1	1.62	1.1	1.11	0.97	0	1	1	1	0	2	3	1
explanations for headline
ID	No	Sample	Disorder	Authors	Year	Title	Journal	P.N	P.male	P.age	P.age.SD	Age.onset	Onset.group	Illness.duration	Antidep.med	Dep.scale	P.dep.score	P.dep.score.SD	P.Hypertension	P.Diabetes	P.Smoking	C.N	C.male	C.age	C.age.SD	C.dep.score	C.dep.score.SD	C.Hypertension	C.Diabetes	C.Smoking	Outcome.type	P.Outcome	P.Outcome.SD	C.Outcome	C.Outcome.SD	Matching	Blinded	Lesion.assessment	Outcome.measure	Primary.int	Rating.scale	Tesla	Layer	Slice.thickness	Gap
outcome ID	study number	sample number	D: major depressive disorder, B: bipolar disorder, B1: BD I, B2: BD II	all authors listed	year of publication	title of the study	journal where study was published	number of subjects in patient sample	proportion of male subjects in patient sample	mean age in patient sample	SD (age) in patient sample	mean age at onset in patient sample	illness onset by group (1: late-onset, 2: late-life, 3: early-onset, 4: not specified)	mean illness duration in years	proportion of subjects taking/having taken antidepressant medication	name of depression scale used in study	mean depression score in patient sample	SD (depression score) in patient sample	proportion of patients with hypertension	proportion of patients with diabetes mellitus (type 1 or 2)	proportion of patients smoking/having smoked	number of subjects in control sample	proportion of male subjects in control sample	mean age in control sample	SD (age) in control sample	mean depression score in control sample	SD (depression score) in control sample	proportion of controls with hypertension	proportion of controls with diabetes mellitus (type 1 or 2)	proportion of controls smoking/having smoked	lesion location (1: OWMH, 2: DWMH, 3: PVH, 4: OGMH, 5: SCGMH, 6: Caudate, 7: Putamen, 8: Globus pallidus, 9: Thalamus, 10: Internal Capsule, 11: Infratentorial, 12: Basal ganglia, 13: Other)	outcome measure in patient sample	SD (outcome measure) in patient sample	outcome measure in control sample	SD (outcome measure) in control sample	0: no matching, 1: matched	0: no blinding, 1: blinded	type of lesion assessment (1: rating scale, 2: automated lesion assessment, 3: semi-automated lesion assessment, 5: other)	1: rating scale, 2: volumetric	0: hyperintensity burden was not part of the primary research question, 1: hyperintensity burden was part of the primary research question	type of rating scale (1: Coffey, 2: Fazeka, 3: Scheltens, 4: Fazeka & Scheltens, 5: Boyko, 6: other)	field strength (T)	1: axial 2: sagittal 3: coronal 4: a+s 5: a+c 6: c+s 7: a+s+c	thickness of slices (in mm)	gap between slices (in mm)
